# Supplementary material for: Size and Zeta Potential Clicked Germination Attenuation and Anti-Sporangiospores Activity of PEI-Functionalized Silver Nanoparticles against COVID-19 Associated Mucorales (Rhizopus arrhizus)
Source: MDPI journal article supplement (doi:10.3390/nano12132235), 2022-06-29
Supplement: s1 [file s1]

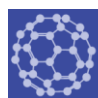

## Supplementary Materials

# Size and Zeta Potential Clicked Germination Attenuation and Anti-Sporangiospores Activity of PEI-Functionalized Silver Nanoparticles against COVID-19 Associated Mucorales (*Rhizopus arrhizus*)

Atul Kumar Tiwari <sup>1</sup>, Munesh Kumar Gupta <sup>2</sup>, Govind Pandey <sup>3</sup>, Ragini Tilak <sup>2</sup>, Roger J. Narayan <sup>4,\*</sup> and Prem C. Pandey <sup>1,\*</sup>

<sup>1</sup> Department of Chemistry, Indian Institute of Technology (BHU), Varanasi 221005, India; atulkumartiwari.rs.chy19@itbhu.ac.in

<sup>2</sup> Mycology Laboratory, Department of Microbiology, Institute of Medical Sciences, Banaras Hindu University, Varanasi 221005, India; muneshg.micro@bhu.ac.in (M.K.G.); tilakragini28@gmail.com (R.T.)

<sup>3</sup> Department of Paediatrics, King George Medical University, Lucknow 226003, India; gvnd121@gmail.com

<sup>4</sup> Joint Department of Biomedical Engineering, North Carolina State University, Raleigh, NC 27695, USA

\* Correspondence: rjnaraya@ncsu.edu (R.J.N.); pcpandey.apc@itbhu.ac.in (P.C.P.)

**Table S1.** List of identified biomolecules in surface-enhanced Raman spectra of *R. arrhizus* sporangiospores treated with PEI-f-AgNP-1 and 2 along with freshly harvested and germinated mycelium controls.

| Wave Number (cm <sup>-1</sup> ) | Mycelial Control | Sporangiospore Control | PEI-AgNP-1 Treated   | PEI-AgNP-2 Treated |
|---------------------------------|------------------|------------------------|----------------------|--------------------|
| 407                             |                  | Trehalose              | Trehalose            | Trehalose          |
| 416                             | glycerol         |                        |                      |                    |
| 462                             |                  |                        | D-galactosamine      | D-galactosamine    |
| 480                             |                  |                        | L-alanine            | L-alanine          |
| 488                             |                  | d- fructose            |                      |                    |
| 537                             |                  |                        | Malic acid, cytosine |                    |
| 548                             |                  |                        |                      | cytosine           |
| 582                             | Succinic acid    |                        |                      |                    |
| 617                             |                  |                        | Thymine              |                    |
| 675                             |                  |                        | Glycerol             |                    |
| 787                             |                  | PEP                    |                      |                    |
| 811                             |                  | GSH                    |                      |                    |
| 814                             | 14 MPDA          |                        |                      |                    |
| 848                             |                  |                        | Stearic acid         |                    |
| 879                             |                  | L- arginine            |                      |                    |
| 896                             |                  |                        |                      | Cellulose          |
| 901                             |                  |                        | Amylose              |                    |
| 914                             |                  | β-D-glucose            |                      |                    |
| 1008                            |                  |                        |                      | β carotene         |
| 1021                            |                  | Galactosamine          |                      |                    |
| 1045                            |                  |                        | L- proline           |                    |
| 1046                            |                  | L-tryptophan           |                      |                    |
| 1065                            | Triolein         |                        |                      |                    |
| 1110                            |                  |                        |                      | Glycerol           |

|      |                   |                      |                      |
|------|-------------------|----------------------|----------------------|
| 1122 | L-arginine        |                      |                      |
| 1126 |                   | N-acetyl glucosamine |                      |
| 1140 |                   | Histidine            |                      |
| 1171 |                   | Acetoacetate         |                      |
| 1205 |                   | Chitin               |                      |
| 1223 |                   |                      | Trehalose            |
| 1224 |                   | GSH                  |                      |
| 1243 |                   | Acetyl coA           | Acetyl coA           |
| 1264 |                   | Amylopectin          | Amylopectin          |
| 1309 |                   |                      | Phenylalanine        |
| 1318 |                   | Glycerol             |                      |
| 1413 |                   | L-proline            |                      |
| 1439 |                   |                      | Vaccenic acid        |
| 1453 |                   | L- Proline           |                      |
| 1455 | Trehalose, Uracil |                      |                      |
| 1501 |                   |                      | Methyl palmitic acid |
